# Supplementary material
Source: publisher site journal article supplement (https://www.spandidos-publications.com/6940/downloadSupplementary)

Figure S1. Flowchart of the selection and evaluation of scientific articles.

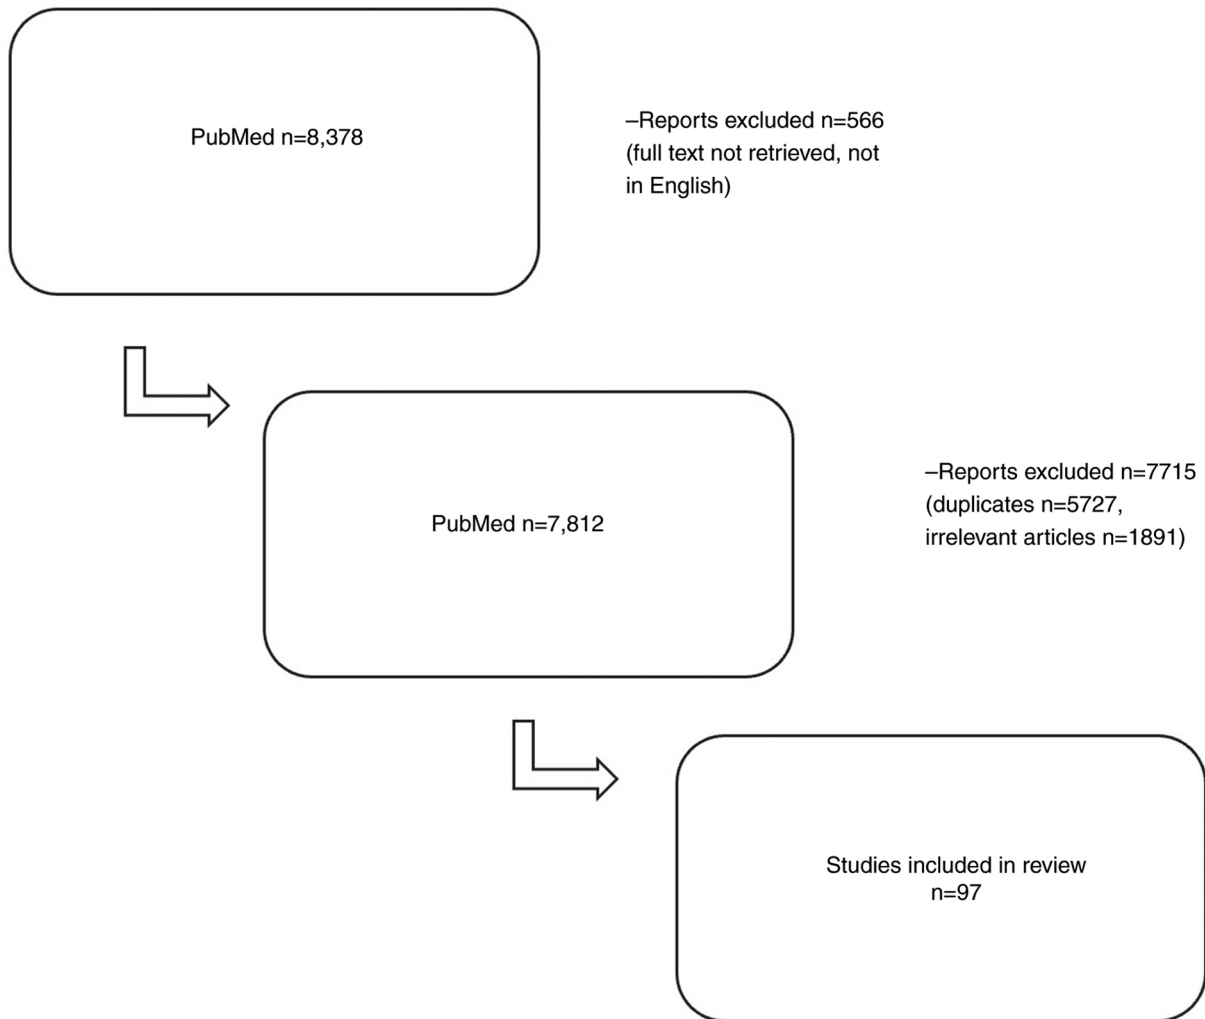

Supplement: Supplementary file 1 [file downloadSupplementary]
